# Supplementary material for: Deregulation of neuronal miRNAs induced by amyloid-β or TAU pathology
Source: Mol Neurodegener. 2018 Oct 12;13:54. doi: 10.1186/s13024-018-0285-1 (PMC6186090; doi:10.1186/s13024-018-0285-1)
Supplement: Supplementary file 1 — Table S1. Overview of miRNA FISH probes. Table S2. All significant miRNAs for age/genotype/age*genotype for APPtg and TAUtg combined, APPtg and TAUtg. Table S3. Predicted targets by TargetScan Mouse (v.7.1) for the six identifief miRNAs. Table S4. Predicted targets of miR-10a-5p, miR-142a-5p, miR-146a-5p, miR-155-5p, miR-211-5p and miR-455-5p that play a role in the production of amyloid-β or TAU (de)phosphorylation. (XLSX 65 kb) [file 13024_2018_285_MOESM1_ESM.xlsx]

## Sheet: Additional Table1
Additional Table 1:
Specifications of the sequence and hybridization temperature of the used FISH probes, with ‘FAM’ denoting a fluorescein tag, ‘l’ a locked nucleic acid (LNA) and ‘m’ a 20‐O‐methyl modified ribonucleic acid.
miRNA	Mimat identifier	LNA sequence	Hybridization temp (C)
mmu-miR-10a-5p	MIMAT0000648	5’-FAM-lCmAmClAmAmAlTmUmClGmGmAlTmCmUlAmCmAlGmGmGlTlA-3’	60
mmu-miR-146a-5p	MIMAT0000158	5’-FAM-lAmAmClCmCmAlTmGmGlAmAmUlTmCmAlGmUmUlCmUmClA-3’	60
mmu-miR-155-5p	MIMAT0000165	5'-FAM-lAmClCmClCmUlAmUlCmAlCmAlAmUmUlAlGmClAmUmUmAlA-3'	58
mmu-miR-211-5p	MIMAT0000668	5’-FAM-lAmGmGlCmAmAlAmGmGlAmUmGlAmCmAlAmAmGlGmGmAlA-3’	70
mmu-miR-455-5p	MIMAT0003485	5’- FAM lCmGmAlTmGmUlAmGmUlCmCmAlAmAmGlGmCmAlCmAmUlA- 3'	60
scramble	n/a	5'‐FAM‐lAmCmUlTmAmClGmCmUlAmGmUlGmUmGlGmAmAlCmGmClT‐3'	58-70

## Sheet: Additional Table2
Additional Table 2
miRNAs that are significantly differentially expressed when assessing the effects of age*genotype, age or genotype in the APPtg and TAUtg combined (all), or APPtg and TAUtg separate. Both log2(fold change) (logFC) and adjusted p-value (adj.P.Val; FDR-corrected p-value<0.05) are given.
samples	all	all	all	all	all	all	APPtg	APPtg	APPtg	APPtg	APPtg	APPtg	TAUtg	TAUtg	TAUtg	TAUtg	TAUtg	TAUtg
model	age*genotype	age*genotype	age	age	genotype	genotype	age*genotype	age*genotype	age	age	genotype	genotype	age*genotype	age*genotype	age	age	genotype	genotype
statistic	logFC	adj.P.Val	logFC	adj.P.Val	logFC	adj.P.Val	logFC	adj.P.Val	logFC	adj.P.Val	logFC	adj.P.Val	logFC	adj.P.Val	logFC	adj.P.Val	logFC	adj.P.Val
Significantly upregulated	13		19		8		13		5		5		0		10		5
Significantly downregulated	0		31		15		5		18		1		0		20		19
	all.int.lfc	all.int.padj	all.age.lfc	all.age.padj	all.gen.lfc	all.gen.padj	app.int.lfc	app.int.padj	app.age.lfc	app.age.padj	app.gen.lfc	app.gen.padj	tau.int.lfc	tau.int.padj	tau.age.lfc	tau.age.padj	tau.gen.lfc	tau.gen.padj
mmu-miR-101a-3p			0.119725	0.00345666											0.128755	0.0415577
mmu-miR-101a-5p			0.115265	0.0403638											0.188624	0.0238051
mmu-miR-101b-3p			0.119674	0.00398002											0.124751	0.0415577
mmu-miR-10a-5p	0.761488	0.02612					1.44134	9.2171e-05
mmu-miR-1193-3p																	-0.389072	0.0493388
mmu-miR-1197-3p					-0.213302	0.0398783
mmu-miR-129-1-3p					-0.217553	0.00524226											-0.186615	0.0373602
mmu-miR-142a-5p	0.639172	1.81518e-05					1.09858	4.01801e-16			0.238924	0.00515316
mmu-miR-144-3p																	-0.612674	0.0301189
mmu-miR-144-5p															-0.597636	0.0415577	-0.597095	0.0493388
mmu-miR-146a-5p	0.451137	0.0450236			0.355268	0.0172912	0.672927	0.000695949			0.594518	3.63086e-05
mmu-miR-147-3p					0.338026	0.0247202
mmu-miR-152-3p					0.178165	0.00797327					0.227588	0.0104285
mmu-miR-155-5p	1.03674	3.29408e-07					1.66942	1.69409e-14
mmu-miR-15a-5p			0.0949996	0.0377585
mmu-miR-15b-5p	0.204575	0.0198565	-0.134948	0.00598539											-0.158125	0.0360764
mmu-miR-16-1-3p			0.2152	0.0112255
mmu-miR-17-3p			-0.180586	0.00199282											-0.254441	0.00147827
mmu-miR-17-5p			-0.134484	0.0209199
mmu-miR-181b-5p			0.12627	0.00155615											0.140195	0.00850166
mmu-miR-1843a-5p			0.113632	0.00247238											0.113767	0.0488569
mmu-miR-1843b-5p			0.0956396	0.0112255
mmu-miR-187-3p																	0.139209	0.0493388
mmu-miR-18a-5p			-0.237803	0.00524724											-0.281224	0.0448139
mmu-miR-193a-3p			0.250833	0.00144725											0.350084	0.00850166
mmu-miR-1981-5p			0.148561	0.0101942
mmu-miR-1983			-0.194154	8.70484e-07					-0.209722	0.00482898					-0.178586	0.0077374
mmu-miR-19a-3p	0.236871	0.0450236	-0.149994	0.0301637
mmu-miR-19b-3p			-0.0957743	0.0377585
mmu-miR-202-5p									-0.895754	0.0155746
mmu-miR-203-3p			0.163599	0.00598539	0.157266	0.0255995
mmu-miR-210-3p			0.188106	0.00121588			0.292573	0.000695949	0.143966	0.0340092					0.232245	0.0150228
mmu-miR-211-5p	1.02115	0.046151					2.26826	8.8469e-17			0.634249	3.63086e-05
mmu-miR-212-3p			-0.109928	0.0392835	-0.118037	0.0446459
mmu-miR-212-5p			-0.269777	0.0134452	-0.264083	0.0397005											-0.352984	0.0430296
mmu-miR-218-1-3p			-0.147997	0.025581
mmu-miR-23a-3p	0.159989	0.0290626
mmu-miR-26b-3p			0.122733	0.0456431
mmu-miR-26b-5p					0.109218	0.0398783
mmu-miR-27a-3p							0.302623	0.0035431
mmu-miR-296-3p			-0.646031	4.5402e-06					-0.660155	0.00342771					-0.631906	0.00850166
mmu-miR-296-5p			-0.781673	5.03163e-18					-0.762537	8.04775e-10					-0.80081	1.06122e-08
mmu-miR-298-3p			-0.924921	9.1682e-05					-0.945544	0.0108541					-0.904299	0.0235063
mmu-miR-298-5p			-0.550314	5.5892e-10					-0.496734	0.00125026					-0.603894	1.73696e-06
mmu-miR-301b-3p	0.295688	0.0116757			-0.273157	0.000145881	0.379148	0.0129396			-0.320149	0.0036114
mmu-miR-3087-3p							-0.601715	0.00145332	0.357293	0.0108541
mmu-miR-3099-3p																	0.213702	0.00606356
mmu-miR-30d-3p			0.0889277	0.0351585											0.139553	0.0370835
mmu-miR-3105-3p							1.03652	0.0336599
mmu-miR-32-5p							0.34124	0.047874
mmu-miR-322-3p			-0.198142	0.0117114
mmu-miR-33-5p															0.178378	0.0241363
mmu-miR-330-3p					-0.102639	0.0102247											-0.142241	0.0119632
mmu-miR-339-5p	0.172273	0.02612					0.313988	0.000317142
mmu-miR-342-5p																	0.164941	0.0493388
mmu-miR-344-3p			0.133104	0.012333
mmu-miR-344d-3p					0.187013	0.0247202											0.25271	0.0119632
mmu-miR-362-5p					-0.208891	0.0311267			-0.279701	0.0474307
mmu-miR-380-5p							-0.443897	0.0125103	0.264284	0.0415353
mmu-miR-381-5p															-0.261349	0.0178548
mmu-miR-409-5p																	-0.615903	0.0118834
mmu-miR-431-3p					-0.110882	0.0255995											-0.146676	0.0430296
mmu-miR-433-3p							-0.207651	0.0438645
mmu-miR-433-5p					-0.155134	0.0138811											-0.217342	0.0101013
mmu-miR-434-3p			0.140751	0.00409561
mmu-miR-434-5p					-0.100048	0.0463056											-0.145464	0.0430296
mmu-miR-450a-5p			-0.220592	0.00366848											-0.255732	0.0415577
mmu-miR-451a	0.545916	0.0450236			-0.398046	0.0255995									-0.648878	0.0144415	-0.679597	0.0119632
mmu-miR-455-5p	0.330089	0.02612					0.606506	0.000740823
mmu-miR-466b-3p			-0.460942	0.000295011					-0.501951	0.0195173					-0.419933	0.0490012
mmu-miR-466c-3p															-0.619458	0.0415577
mmu-miR-466c-5p			-0.389949	0.00658102					-0.497313	0.0146175
mmu-miR-466d-3p			-0.487009	0.00247238											-0.582277	0.0415577
mmu-miR-467a-5p			-0.305063	8.70484e-07					-0.371037	0.00125026					-0.239088	0.0144415
mmu-miR-467b-5p			-0.343348	0.0112255					-0.395108	0.0490913
mmu-miR-467c-5p			-0.610592	0.000140367					-0.787608	0.000922252
mmu-miR-467d-5p			-0.230357	0.00536489					-0.342445	0.0155746
mmu-miR-467e-5p			-0.291877	0.000191721					-0.357384	0.00805245
mmu-miR-484			-0.155959	9.21132e-05					-0.179554	0.0415353					-0.132364	0.00850166
mmu-miR-487b-5p																	-0.744715	0.0119632
mmu-miR-488-3p			0.109446	0.00278759
mmu-miR-493-5p							-0.365249	0.0442359
mmu-miR-495-5p							-0.820469	0.000367839
mmu-miR-501-3p																	-0.370245	0.0373602
mmu-miR-540-3p																	-0.162517	0.0493388
mmu-miR-542-3p					0.322346	0.0247202					0.462978	0.0493842
mmu-miR-544-3p					-0.174422	0.00797327											-0.220542	0.0123215
mmu-miR-592-5p			0.18336	0.00188016					0.211238	0.0365602
mmu-miR-6516-5p									0.354687	0.00425234
mmu-miR-665-3p																	-0.180092	0.0493388
mmu-miR-666-3p																	-0.212075	0.00606356
mmu-miR-666-5p					-0.132454	0.0397005											-0.238883	0.00606356
mmu-miR-669a-3p			-0.377091	0.000126224					-0.361909	0.00799651					-0.392273	0.0238051
mmu-miR-669a-5p			-0.390144	0.000482553					-0.392772	0.00799651
mmu-miR-669c-5p			-0.243234	0.00144725
mmu-miR-669d-5p			-0.380855	0.0331823											-0.480737	0.0488569
mmu-miR-670-3p			-0.222459	0.00598539
mmu-miR-6944-3p			-0.162999	0.00658102											-0.24594	0.0077374
mmu-miR-6953-3p					-0.234041	0.0387377
mmu-miR-7075-3p															0.383278	0.00850166
mmu-miR-758-3p					-0.13162	0.0463056											-0.19518	0.0493388
mmu-miR-7b-5p					0.239697	0.0398783											0.306396	0.0373602
mmu-miR-93-5p	0.124625	0.0450236	0.079857	0.0301637			0.233496	0.000311205
mmu-miR-99a-3p									-0.0988044	0.0415353

## Sheet: Additional Table3
Additional Table 3
Predicted targets per miRNA, as based on TargetScan Mouse version 7.1.
mmu-miR-10a-5	mmu-miR-142a-5p	mmu-miR-146a-5p	mmu-miR-155-5p	mmu-miR-211-5p	mmu-miR-455-5p
Usp45	Zfp275	Rnf103	Gm21967	Fry	Mylip
Rgs8	Cars2	Per1	Raver2	Kcna2	Ptp4a2
Bach2	Nck2	Slamf1	Pard3b	Ephb6	Nck2
Klf11	Krtap20-2	Ube2g1	Pald1	Ccdc117	Hnrnpl
Lpar2	Chsy3	Cdh5	Map3k14	Myo10	Papolg
Map2k6	Slc5a3	Ccdc117	Sec14l5	Ddx6	Ankrd27
Bdnf	Avpr1a	Lcor	Usp45	Palm2Akap2	Eed
Cep85l	Cul4a	Sbspon	Wwc1	Mmp13	Suz12
Slc6a19	Ddx6	Fam65b	Myo10	Ap1s2	Gdap2
Hoxa3	Rcn2	Gm5111	Cd274	Rnf103	Muc19
Zfp367	Rap1a	Irak1	Lrrc59	Zfp398	Luc7l3
Map3k7	Ddx5	Slc10a3	Tshz3	Gcnt2	Baz1b
Arsj	Zfpm2	Atp6ap1	Gpm6b	Plag1	Gm9938
Hoxb3	Pds5b	Nova1	Zfp236	Cox5a	Pnrc1
Gata6	Dmd	Pgp	Ssh2	Rhobtb3	Trak2
Rora	Uba3	Hnrnpd	Sox1	Arhgef26	Tmem30a
Ebf2	Rhobtb3	Rhot2	Actl7a	H2-M2	Gm5464
Sobp	Klf11	Tdrkh	Carhsp1	Chn2	Cpeb1
Nr6a1	Onecut2	Hormad1	H3f3a	Nostrin	Cept1
Papd5	Ube2a	Fbxw2	Fgf7	Rgs8	Prep
Dvl3	Gng13	Ascl4	Dync1i1	Mcoln1	Dcaf5
Vwc2l	Srebf1	Msh5	Nfe2l2	Pid1	Shc3
Tmem183a	Atxn7l2	Rbm33	Jarid2	Tomm70a	Socs3
4933426M11Rik	Stau1	D030056L22Rik	Ndfip1	Ssr3	Tomm22
Csmd1	Med28	Slc39a1	Hif1a	Smim13	Enoph1
Klhl29	Ranbp1	Appl1	Rcn2	Ssrp1	Sox11
Patl1	Fbxl3	Numb	Sypl	Ap1s1	Rab18
Dusp3	Ube2d1	Tmem120b	Acta1	Slc43a1	Cacnb4
Rorb	Sh3kbp1	Irak2	Zic3	Grin2b	Mtf2
Dazap1	Slc39a8	Traf6	Sgk3	Ick	Cdk14
Fign	Hnrnph3	Ank2	Traf3	Camk1	Taf4a
Ago3	Etfdh	Lipa	Cebpb	Nr3c1	Irf2
Sdc1	Ssh2	Parp1	Rnf123	Lsm5	Cdv3
Bmp2k	Ric8b	P2ry4	Picalm	Ak4	Dyrk1a
Galnt1	Vmp1	Psmd3	Cdc73	St7	Yipf6
Ptp4a2	H1f0	Zfp2	Uap1	Agap2	Lnp
Mrps18c	Cnep1r1	Cln6	Plag1	Gba	Add3
Tmod1	Iltifb	Vasn	Mlycd	Mapre2	Cdk13
Ncor2	Slc17a7	Gm10521	Inpp5d	Spryd7	Tmed2
Pafah1b1	Appl2	Med1	Aicda	Ankfy1	Gabarap
Gfpt1	Cisd2	Syt1	E2f2	Ttyh1	Brd1
Bbx	Srgap1	Esyt2	Tle4	Dera	Serp1
Lhfpl4	AI467606	Rel	Myb	Creb3l4	Nhlrc4
H3f3b	Lmx1a	Otud1	Trim32	Samd5	Unc5b
Wnt9b	Mnat1	Gpr21	Dnttip1	Dnajc14	Usp9x
Mtf2	Atp1b1	Eif4g2	Ptpn2	Gabarapl2	Nrxn1
Cyth1	Mbip	Baiap2l1	Selt	Shc3	Slitrk5
Trim39	Bai3	4933426M11Rik	Tomm20	Ezr	Rin2
Slc35g1	Tnfsf9	9930022D16Rik	Ern1	Nrbf2	Gm10295
Creb1	Mea1	Lrrc15	Tcf4	Arl8b	Kcnj2
Map3k2	Herpud1	Paqr9	Gdf6	1700066B19Rik	Dock9
Celf2	Rnf146	0610009O20Rik	Hnrnpa3	Ppm1k	Ranbp3
Gnrhr	H3f3a	Slc22a3	Lcor	Tbl1x	Kdm3b
Itgb8	Sgce	Usp3	Csnk1g2	Elavl3	Calb1
Eri3	Capn10	Klhl42	Casp12	Efnb3	AI846148
Tmem132b	E130311K13Rik	Yipf7	Meis1	ZBED6	Wtap
Trim66	Galnt3	Edc3	Ccdc130	Hapln1	Lin28b
Dock11	Sumo2	Nrip3	Dhx40	Slc38a5	Clock
Npas3	Nfe2l2	Sh3gl2	Ttc28	Gxylt2	Rassf3
Mtf1	Tdo2	Strbp	Rab11fip2	Rnf122	Ddx3x
Lphn1	Dynlt1a	Zdhhc7	Socs1	Sec61a2	Col8a1
Purb	Dynlt1f	Prx	Trp53inp1	Ncoa7	Tjp1
Esrrg	Dynlt1b	Gosr1	Cacul1	March3	Arrdc3
Smtnl2	Dnajc25	Stx3	Lcorl	Ccdc50	4930523C07Rik
Gata3	Tnfsf8	Rims2	Tbc1d15	Chp1	Hykk
Prrx1	Tcf21	Card10	Arid2	Cap2	Mfsd12
Cecr6	Stx3	Glra2	Scg2	Nr3c2	Lphn3
Gtf2h1	Ccng2	Onecut2	Inadl	Rhot1	Epdr1
Zfp282	Fzd7	Cd28	Rnf149	Ap1s3	Usp3
Scarb2	Caprin2	Maff	Rufy2	Ap2a2	Gjc1
Celf6	Btg3	Syn1	Msantd1	Ankrd13a	Baz2b
Sh3d19	Rhoc	Dot1l	Rcor1	Cacng2	Camk4
Rqcd1	Bnip2	Znf512b	Arntl	Dnajc13	Ppp1r12a
Hoxa1	Usp15	Ceacam1	Wbp1l	Efemp2	Nr4a2
Rap2a	Mal2	Zscan29	Brwd1	Tmod3	Actn1
Epha5	Vps54	Il18rap	Cenpl	Igf2r	Eif3j1
Son	Msh6	Paqr5	Ppp1cb	Zcchc24	Kdr
Cdc42bpa	Acadsb	Rbl1	Nsun3	Ppic	Rfx4
Gm9754	Dusp2	Ier5l	Atxn1l	Evc2	Ptbp2
Gpatch2l	Fam19a1	Tanc2	Shh	Nbr1	Jdp2
Trim2	Rad21l	Otud7b	Mier3	Tox3	Ttc17
Ssx2ip	Hoxd8	Samd12	Map3k10	Aaed1	Slc17a6
Elovl6	Rnh1	Ehf	Necap1	Rabgap1l	Atp11c
Inhbb	Dlg1	Scn3b	Myo1d	Ebf2	Rims4
Bcr	Six4	B3gnt5	Wee1	Naa40	Rc3h1
Rhpn2	Tanc1	Lin7a	Smug1	Rspo3	Tnpo1
Tfap2c	Edc3	Tardbp	Csnk1a1	Smoc1	Tnrc6b
Fbxo30	Pibf1	Tmem150a	Rs1	Nrg3	Tubb5
Bcl2l11	Mak	Snx22	Stard6	F10	Fbxo42
Pde4a	Btbd10	1700052N19Rik	Rapgef2	Alpl	Stk24
Iffo2	Crk	Angptl2	Csf1r	Szrd1	Ets1
Bcl6	Luzp2	Mrpl48	Tcf7l2	Pcyox1l	Nrg1
Atf2	Set	Stc1	Hivep2	Fam168b	Secisbp2l
Nr4a3	Rbm24	Kdm2b	Ckap5	Farp1	Lsm12
Smap1	Car8	Bag1	Upp2	Rsrc2	Tbl1xr1
Grin3a	F2rl1	Bivm	Stxbp5l	Creb5	Wdr45b
Rc3h2	Twistnb	Aff2	Mbtd1	Esrrg	Slc30a5
Cept1	Shc3	Zfp367	Tada2b	Zfp521	Cpsf7
Klf7	Cbln4	Flna	Atg3	Rap2c	Prorsd1
Mtss1l	Rhoa	Notch1	Zfp652	1810013L24Rik	Peak1
Tbx5	Necab1	Runx1t1	Rps6ka5	Mllt3	Dync1li2
Nr2c2	Gm20388	Gdnf	Fgf13	Prdm2	Memo1
St6galnac6	Scoc	Deptor	Ap3d1	Tcf12	Thsd7a
Elavl2	Galnt2	Clcn4-2	Det1	Lmod3	Sema4g
Homez	Ldb2	Kctd15	Etv3	Arhgap11a	Rnf44
Nyap2	Zfp503	Cask	Tspan14	Atf2	Galnt7
Ccdc177	Socs1	Cnot6	Emp2	4833423E24Rik	CTNND1
Ncoa6	Tmem54	Taf9b	Kras	Jarid2	Pou4f2
Gm5065	Emc4	Znrf3	Bach1	Rab8a	Ctnnd1
Has3	Tifab	Arl8a	Satb1	Papln	Pnisr
Usp29	Cacng7	mt-Nd6	D5Ertd579e	Ipcef1	Zfp704
Hnrnpk	Toe1	Elavl1	Nyap2	Gramd3	Zfp292
Slc6a5	Irf9	Tmem200b	Boc	Ppp3r1	Ndfip1
Il1rapl1	Mdga2	Bcorl1	Jade1	Foxc1	Fbxl7
Flt1	Fgf15	Cdh6	Vezf1	Epha7	Phf12
Rnf165	Med17	Ptp4a2	D1Ertd622e	Hmga2	Adnp
Kpnb1	Tmem108	Smad4	Rreb1	Zfp629	Kcnh7
Ankfy1	Dnajc7	Plp1	Tbr1	Map1lc3b	Plcxd3
Fxr2	Pura	Btg2	Smad5	Sox11	Rab3il1
Eif3j1	Fgf4	Ywhab	Tab2	Rnase6	Pgap2
Cnnm4	Igf2bp3	Casz1	Zfp518a	Bcl7a	Zfpm2
Lcor	Pp2d1	Cnot6l	Cops3	3110043O21Rik	Stt3b
Ctnnbip1	Nek4	Armc8	Sdcbp	Abcb10	Inpp5k
Gm527	Rsrc2	Jazf1	Dnajb1	Sirt1	Mknk1
Blzf1	Paip1	Primpol	Akap10	Six1	Lrp2
Lgalsl	Pcgf3	Banf1	Uba3	Eef1e1	Frk
Shank3	Prrg4	Kif24	Papola	Zfp36l1	Fzd5
Spag9	Lhx8	Rarb	Antxr2	Arx	Glis3
Srsf1	Zbtb37	Mb21d2	Smarca4	Runx1t1	3830406C13Rik
Epha8	Slc16a9	Nf2	Entpd7	Fras1	Cd47
Pten	Zfp770	Ptgfrn	Nrg3	Ctnnbip1	R3hdm2
Klf4	Capn7	Robo1	3110002H16Rik	Lamp1	Galnt13
Tiam1	Krt34	Nlgn1	Brwd3	Crat	Kdm6a
Hoxd10	Klf10	BC030336	Fosl2	Hmx1	Tvp23a
Tnrc6b	Setd2	Lin28a	Heca	Lcor	Zfand5
Tram1	1500011K16Rik	A130010J15Rik	Spred1	Rab14	Rnf165
Smurf1	Spock2	Ar	Rps6ka3	Mmab	Arid1a
E2f7	Slc18a2	Zfp532	Hdhd2	Tex13	Rnf111
Onecut1	Elavl2	Cxxc4	Olfml3	Nphp3	Pag1
Csrnp3	Gdnf	Rassf9	Gpd1l	Pum2	Ipo7
Tra2b	Cbx3	Abl2	Arrdc4	Mmp8	Acot11
Tbkbp1	Plekha3	Dcx	En2	Cdh4	Pclo
Rybp	Mbd2	2010111I01Rik	Mef2a	Fam126a	Nfia
E130309D14Rik	Prpf40a	Mat2a	S1pr1	Sgip1	Stx1b
Popdc3	Gmcl1	Arl5b	Trim44	Uba6	Shoc2
Rassf4	Cul2	Klf7	Ttl	Dynll1	Nr3c2
Arrdc3	Pip5k1b	Mybl1	Crebrf	Ikzf5	Ric3
Tmem170b	Tspan14	Klf4	Strn3	Hoxa3	Usp47
Klc2	Becn1	Dlg1	Astn2	Kctd1	Vkorc1l1
Scn3a	Degs1	Cbfa2t2	6430571L13Rik	Ptprd	Zfp516
Zdhhc21	Dynlt1c	Bend4	Fbxo11	Gm15737	Fer
Pias1	Aadat	Gpatch2l	Nkx3-1	Reep1	Homer1
Stk4	Npas4	Psen1	March7	Nuak1	Kpna3
Nr5a2	Actc1	Ubxn7	Ikbke	Cpne8	4930402H24Rik
Bcl2l2	Slc16a12	Zfp697	Rab34	Clmp	Patl1
Ccdc71l	Cnot11	Sec23ip	Ets1	Spryd4	Gpr116
Rbm27	Fgg	Myt1	Nr2f2	Mrps33	Fbxo33
Cadm2	Asphd1	Fgf6	Cdh12	Tgfbr2	Fign
Baz2b	Cdh9	Lrrtm2	Adam10	Bcl2	Eps8l1
Mtmr3	Ifrd2	Tef	Rheb	Col6a1	Atp13a3
Nacc1	Zcchc11	Pik3cb	Socs6	Ociad2	Cds2
Wnt8a	Syncrip	Skap2	Rora	Setd8	Rfx7
Ppara	Alas1	Adamts3	Foxi3	Mmgt1	Fam84a
Usp46	Actn4	Cblc	Bsdc1	Serinc3	Cdkn1b
Mmadhc	Rab6b	Gjc1	Dcun1d3	Crtac1	Nlk
Kctd16	Rhoq	Cables1	Rspo2	Slc17a7	Adipor2
Ino80d	Selk	Hipk3	Etnk2	Sla2	Plxdc2
Slc38a2	Lrp12	Dnah14	Ngef	Dhh	Cdyl2
Usf2	Otx2	Rpp25l	Sall1	Hook3	Bend4
Jarid2	Ppip5k2	Dcaf12	C1ql2	Akap1	Zxdc
Kcna6	Soat1	Celf1	Nova1	Elovl6	Runx1t1
Ltbp1	Tbc1d8	Wtap	Itk	Tppp	Oprd1
Cbx5	Diap3	Tomt	Card11	Pde1c	Pja2
Myt1l	Kras	Dlst	Kansl1	Klf12	Vcan
Zfp608	Man1a	Btla	Rnd3	Ube2v2	Gpx4
Mybl1	Zfand3	Tinag	4932411E22Rik	Tnrc6b	Ebf1
Fnbp1l	Trpc4ap	Syn2	Ms4a1	Taf5	Gabrb2
Zbtb16	Tapt1	Lrrc8b	Aak1	Dynll2	Dhx40
Cadm1	Epas1	Eif5a2	Pea15a	9330182O14Rik	Pcdh1
L3mbtl3	Ube2e3	Pip5k1b	Tmem178	Fam160a2	Eif2ak1
St6galnac5	Iqsec1	Smarca5	Pcdh9	Rab22a	Zfp606
Hcn1	Adamts1	Set	2610002M06Rik	Ap3m1	Znrf1
Cops7b	Skp2	Tmem136	Fam168a	Frs2	Trim33
Hdac4	Sirt7	Hipk1	Arl5b	Soat1	Slitrk2
Arih2	Cdc37l1	Lsm11	Pskh1	Rnf125	Unc80
Prrt3	Bbs9	Cdon	Ywhae	Efna5	Igf1r
Snx4	Wwp1	Gabrb1	Sp3	Rab1	Rasgrp4
Kctd17	Pcbp1	Mmp16	Srp54b	Sf3b1	Zfyve16
Ank3	Fam45a	Hnf4a	Mafb	Slc37a3	Dlgap4
Grin2b	Stk38l	Gm5549	Fam105a	Nova1	Tmem33
Sertad4	Hoxb2	Grid1	Cacnb4	Zbtb7c	Chst7
Dlgap2	Fbxo30	Ptpra	Rela	Dcun1d3	Ube2k
Zmynd11	Arhgef40	Gabpa	Smndc1	Lrp2	Kctd15
Zxdc	Atf1	Srsf6	Sertad2	Wnk1	Ube2w
Sesn3	Asxl2	Lypd1	Baiap2l1	C330018D20Rik	Hoxa3
Tenm2	Ppm1g	Zfp191	1810011O10Rik	Rab40b	Traf7
Mapkbp1	Ginm1	Hnrnpul2	Pam	Tcf4	Obfc1
Msr1	Etv1	Zfyve1	Prpf39	Serp1	Rrnad1
Mief1	Slain1	Me3	Gm340	Rnf24	Slc39a5
Calcr	Fam134b	Rfx7	2510009E07Rik	Syncrip	Caln1
Med1	Ubr3	Gria3	Sla	Zdhhc15	S1pr1
Jmjd8	Ackr3	Dnajb14	Igdcc4	Spred1	Sdccag8
Wnk3	Cycs	Prom2	N4bp1	Fnip1	Derl2
Purg	Setd1a	Ube2d2a	Ski	Arcn1	Dimt1
Irs4	Klhl14	Dennd4b	Reps2	Mafg	Shroom1
Chl1	Dtl	Lrrk1	Tceb1	Angpt1	Ppp2ca
Whsc1l1	Fgf13	Siah2	Kbtbd2	Htr1b	Lgi3
Gabrb2	Gopc	Shc1	Zbtb16	Scrt2	Pdap1
Camk2b	Fbxo45	Tfdp2	Rsrp1	Metap1	Nhej1
Rb1cc1	Sgip1	Elmsan1	Daam1	Fbxl19	1810022K09Rik
Bicd2	Ubl3	Dtl	Phf21b	Dmtf1	Rnf34
Ank2	Zfp36	Pou3f2	Atp6v1g1	Scn3b	Polr3g
Fam196a	Cadm2	Prrc1	Mybl1	Btbd1	Ltc4s
Nup50	S1pr1	Myo5a	Dmtf1	Atp8b1	Aagab
Nfix	Id2	Gucy2e	Cd47	Npr2	Wdr41
Mycbp	Son	Qk	Irf2bp2	Crkl	Abi3
Irs1	Nck1	Nrp2	Mob4	Ccdc120	Lrrc40
Fosl2	Fgf16	Sort1	Fbxo33	Fam117b	Diablo
Ppargc1b	Surf4	Nsd1	Kdm7a	Rps6ka5	Fli1
Cnot6	Msrb3	2006-09-01	Slc38a4	Tgfbrap1	Ldlrad4
E2f3	Cask	Sox5	Zbtb20	Pik3cb	Xpo5
Xrn1	Grsf1	Tnik	Zdhhc20	Slc22a3	Ubl7
Igf2bp2	Robo1	Pak3	Mxi1	Gins3	Cyp8b1
Gbp7	Bmp2	Mlxip	Usp9x	Pik3ip1	Leap2
Prtg	Snx3	Sp8	Brd1	Khdrbs1	Snx11
Rims2	Rhot1	Kcnd3	Mex3b	Dlg5	Rad51d
Arnt	Med14	Ppp2r3a	D15Ertd621e	Zdhhc14
Ctdspl	Ncapg2	Fcgr2b	Rhoq	Coro1c
Emb	Ddhd1	Foxo3	Upf2	Esr1
Pea15a	Prpf4b	Rspo2	Gm9938	Mtmr6
Fam63b	Cntn1	Tmem33	Fam135a	Tmem178b
Nfatc2	Kif13a	Celf2	Ubl4	Lfng
Slc41a2	Pcbp2	D1Ertd622e	Cdc42ep1	Picalm
Usp12	Ptpn2	Usp47	Cyb561d1	Wee1
Sorcs1	Cpeb2	C530008M17Rik	Rnf146	Ikzf2
Ubxn7	Slc25a40	Pfn4	Gsk3b	Dyrk1a
Wdr26	Nog	Erbb4	Gm10797	Fam43a
Ube2z	Cdk5	Cdkn3	Agtrap	Pou3f2
Epha4	Neto2	Tnrc6a	Sox10	Meis1
Rfxank	Fam199x	Gm28049	Zswim6	Srp72
Klhl15	Kcns3	Gif	Sema5a	Fam107b
Cdc6	Rffl	Syn3	Dyrk2	Rragc
Taf12	Tbc1d8b	Kmt2d	Grip1	Col5a1
Dusp11	Alkbh5	Dcp1a	Sufu	Zbtb20
Spty2d1	Nsun3	Nudt17	Pde7a	Sec24d
Kl	Snx16	Crtc1	Slc38a2	Ltbp1
Lrig2	Nckap1	1700021F05Rik	Nufip2	Ccnt2
Wapal	Gm4847	Dgkg	Mok	Pcdh12
Zbtb1	Tmem245	Fam160a2	Zfp703	Lrrc31
Elavl3	Baz2a	March6	Tfdp2	Gfap
Usp15	Sytl5	Pcolce2	Rasef	2003-09-01
Slc25a1	Gpr6	Plekhf1	Cds1	AI317395
Golga3	Kitl	Spon1	Kpna1	Rab3c
Clcn5	Dock4	Gm5084	Pank1	Trp53inp1
Ube2k	Kcnq3	5730455P16Rik	Acbd3	Slc35g1
Pdzd2	Tle4	Surf2	Fubp1	Bicc1
Mapre1	Cnot6	Itm2b	Usp3	Trip12
Naa15	Cd69	Dlgap2	G3bp2	Has2
Tfap2a	Sec23a	Ednrb	Apc	Csgalnact2
Cep350	Setd3	Plekhh2	Fgf9	Fmo2
Plcb2	Rgs17	Srr	Plekhm1	Eva1c
Ahsa2	Zbtb20	Hspa4l	Zmym2	Slc25a35
Rprd1a	Spcs2	Syt7	Peli1	Ktn1
Smad2	Arfgap2	Ptrh2	Kpna4	Tcf20
Kif13b	Fcho2	Tmem45a	Usp48	Cep57l1
Bora	Lrp2	Slc39a5	Nr3c2	Tanc2
Ankrd12	Mlh3	Trim45	Prox1	Phf20
Shisa7	Stag1	Raver2	Bnc2	4930402H24Rik
Nfat5	Lrat	Sfpq	Trps1	0610030E20Rik
Chd6	Cwc25	Thap3	Midn	Gucd1
Kcnh5	Acsl6	Mms19	Znrf3	Triap1
Btrc	Macf1	Gmpr	Nfia	Zfp91
Mcmbp	Lhx1	Srp14	Elavl2	Mbnl1
Nav1	Plekha7	Prorsd1	Mctp1	Mgat3
Tmem260	Kcnh7	Myo6	Cd99l2	Cmtm6
Ctdspl2	Npat	Adam15	Qk	Glis3
Palm2	Txn2	Magi2	2011-09-01	Tm4sf19
D1Ertd622e	Spag1	Pold4	Nrp1	Lhfpl4
Slc39a5	Myo1d	Cdc42bpb	Sox11	Samd12
Zdhhc18	Eif4e3	Eif3h	Xkr4	Pde3a
Gatad2a	Kcnk1	Mterfd3	Nfib	Adrb1
Elmo3	Pfkp	B430305J03Rik	Klf3	Il6ra
Aff4	Cdk17	Stau2	Pura	Bcl9
Cask	Fam155a	Tmpo	Nbeal1	Ube2h
Idh2	Zcchc14	Gpbp1	Rptor	Akap2
Dll4	Zbtb46	Pecr	Zfp644	Rab9b
Psmd1	Cpsf6	Luc7l2	Kdm2a	Fam122b
Brf2	Selt	Kif26b	Acvr2a	Rasgef1b
Lancl1	Fip1l1	Hao1	Peg3	Palm2
Tbc1d10a	Enpp5	Nmd3	Creb1	Pcgf3
Cd38	Apln	Nags	Zbtb1	Fam175b
Trpc5	Hiat1	Whamm	Stx16	Dpy19l4
Zfp827	Trip10	Slitrk3	Ctla4	Rimklb
Mmp14	Rprd1b	Ing2	Pcdh17	Plxna2
	Arhgef6		Trim2	Sgcz
	Zfpl1		Fbxl2	Tatdn3
	Mat2b		Lrp1b	Fubp3
	Metap1		Scn1a	Rsc1a1
	Fbxo21		Arrb2	Frmd5
	4933406J08Rik		Arid4a	Hdac9
	Armcx4		Bcorl1	Arl5b
	Ier5l		Ehf	Gramd1c
	Hdlbp		Ago3	Sox4
	Egln3		Kctd16	Set
	Rsf1		Chd7	Pcyt1b
	Zdhhc20		Cdip1	Fgf18
	Nrg1		Rab30	Adcy6
	Snx6		Ppig	Nbea
	Acin1		Ano5	Poc5
	Casp9		Sort1	Ypel2
	Rab11b		Rbm11	Gapvd1
	Atg16l1		Map3k2	Socs6
	Dram2		Zfp704	Zfp282
	Hmgcll1		Msr1	Xrn1
	Nhlrc2		Sp1	Wdfy2
	Sgcd		Fzd5	Elf2
	Stx11		Tm9sf3	Hs2st1
	Rasef		Cacna2d1	Fbn2
	Zfp664		Bdnf	Rreb1
	Rgmb		Fam84a	Smc2
	Ttpa		Fam212b	Lpar1
	Zfr		Kcna1	Cpd
	Foxa1		Ptchd4	Gan
	Tsc22d2		Zfp518b	Chd5
	Nhlh2		Ebf1	Arl5a
	Kit		Kcnh7	Khdrbs3
	Homer1		Rbm47	Rictor
	Kcnj3		Agap1	Podxl
	2310033P09Rik		Cab39	Gpr176
	Fbxo38		Cstf2	Zeb1
	Elavl4		Spc25	Arid3b
	Rerg		Tbc1d30	Ndrg3
	Tcf12		Fer	Itpr1
	Btbd7		Zfp618	Tmem178
	Wdr26		Mypn	Rp1l1
	Usp9x		Med14	Slc25a46
	Spsb1		Pcsk9	Gpm6a
	Cep170		Acvr1	Caprin1
	Sgms1		Itgbl1	Vhl
	Cps1		Galnt13	Ttc14
	Yy2		Paxbp1	Arhgap29
	Cylc1		Vti1a	Acsl4
	Bhlhe41		Camta1	Hdhd2
	Eif3j1		S100pbp	1110002L01Rik
	Armc8		Eif2ak1	Gnaq
	Gucy1b3		Lrp6	Ipo8
	Mat2a		Spty2d1	Rbmx
	Pphln1		Rho	Rims2
	Ube2d3		Ncoa5	Tmem136
	Kat6b		Kcna4	Ppargc1a
	Unc80		Wnk3	Nt5e
	Ptpn4		Pkn2	Runx2
	Mycn		Lrch3	Lrrc8d
	Ccdc85a		Pank2	2010111I01Rik
	Synj1		Cpd	Ddi2
	Runx1t1		Zfp407	Birc6
	Senp5		2310035C23Rik	Leprel1
	Ccdc88a		Ago2	Magi2
	Fam73b		Ehd1	Tmem64
	Rb1cc1		Ptprj	Primpol
	Wnt11		Cdon	AI597479
	Ankrd33b		Mark2	Slc18a1
	Fbxo3		Kif26b	Pggt1b
	Fos		Stc2	Il23a
	Gstcd		Hhip	Zfyve20
	Ism2		POU2F1	Tnik
	Alcam		Sema3a	Atf6
	Als2		Ywhaz	Atp2b1
	Reps2		Fgf16	Fbxw7
	Kif5c		Rictor	Trpc5
	Fam107b		Enah	Lgr4
	Marveld2		Pde12	Ap5m1
	St6galnac6		Rest	Pcdhga12
	Scn4b		Sos1	Mlxip
	Ipmk		Wnk1	Ppp1cc
	Irf2bp1		Cyp7b1	Dtx1
	Aph1a		Acot12	Gabbr2
	Scyl3		Smad2	Hspa4l
	Ccnt2		Leprel1	Cdh2
	Dlx3		Mrpl39	Nptx1
	Tenm4		Tlr5	Dlg1
	Spopl		Trappc10	Tcl1
	Tbx1		Pou2f1	Camk1d
	Mastl		Eefsec	Mon2
	Jak1		Rnf111	Phf13
	Vangl1		1700019N19Rik	Znrf3
	Prkg1		Trip12	Tpm3-rs7
	Map3k13		Lekr1	Zfhx4
	Trim3		Gatad2b	Spop
	March7		Tnik	Arrb1
	Itga9		Rccd1	Zdhhc17
	Kcna4		Thoc1	Rasa3
	Eif5b		Tagln	Arap2
	Bod1l		Clp1	Ripk1
	Mgat5		Sf3b1	Nfatc3
	Atp7a		Sft2d2	Rps6ka3
	Fam134a		Fam210a	Sin3a
	Get4		Zbtb18	Bcl2l2
	Stk35		Gnas	Irf2bp2
	Rnf165		Uqcc1	Atp8b2
	Hipk1		Syvn1	Nr4a2
	Slc23a2		Nudt5	Tram2
	POU2F1		Slc15a5	Ube2r2
	Cacna1e		Sass6	Evx2
	Chmp7		Ell2	Mapk1ip1l
	Ebf3		Slc39a5	Cacna1b
	Sp2		Ppwd1	Nrarp
	Cast		Lamp2	Ski
	Epn2		Emx2	Zfp335
	Krit1		Nell2	Ppp4r1
	Npc1		Prorsd1	3830408C21Rik
	Arrdc3		Vps53	Zfhx3
	Zc3h12c		Traf3ip1	Gpr101
	Spag9		Mob2	Rad21
	Otud4		Swt1	Paqr7
	Strn3		Fezf2	Nfat5
	Trp53inp1		Dusp7	Sos1
	Prox1		Letmd1	Sgcd
	Cog3		Fgf12	Naa30
	4931406P16Rik		Bcat1	Elavl4
	Camta1		Nkrf	Rnf20
	Cdh24		Trpc4	Creb1
	Glra2		Fat1	Preb
	Opn1sw		Ccne1	P4hb
	Igf1		Cnot10	Klhl32
	Mfn1		Il21	Adamts9
	Map3k1		Hs6st2	2011-09-01
	Rc3h1			POU2F1
	Tiam1			Hnrnpa2b1
	Chm			Lgi1
	Ap3m1			Myo1c
	Lims1			Nfia
	Spire1			Prmt6
	Samd12			Tcf7l1
	Hecw2			Gm340
	P2rx4			Rnft2
	Trip11			Gabrb3
	Trhde			Nhsl2
	Tceanc2			Map3k3
	Hoxa1			Ddx19a
	Usp10			Appl1
	Blcap			Igf2bp3
	Cdh12			Fam178a
	Nfat5			Slc38a9
	Zfp651			Grm1
	Yy1			Edem1
	Btbd1			Rorb
	Slitrk2			Crispld1
	Lrp1b			Bmp3
	Gk5			Cbx8
	2007-09-01			Rtkn2
	Pfn2			Gm4861
	Slitrk4			Tmem41a
	Cpeb3			Gpbp1l1
	Gabrg3			Ywhag
	Mex3a			Pigv
	Taf4a			Lsamp
	Gm9966			Dennd4b
	Kpna4			Aph1a
	Cyp26b1			Six2
	Mfsd9			Larp4b
	Lphn3			Sh3pxd2a
	Myf5			B3gnt1
	Hltf			Atg7
	Bcor			Baz2a
	Slc24a2			Cxadr
	BC030336			Prrx1
	Ankib1			Vwc2
	Abca1			Dusp19
	Shc4			Kcna4
	Sun1			Prpf38b
	Csmd3			Zcchc14
	Brwd3			Naa15
	Pank3			Cd2ap
	Acap2			Slc16a6
	Dio2			Slitrk4
	Lzic			Foxp2
	Acot12			Dedd2
	Tspan3			Gdnf
	Mysm1			Brpf3
	Cdon			Pou2f1
	Rab3gap2			Ndnf
	Prkaa2			Nxpe3
	Mpped2			Cdx2
	Bche			Plekhm3
	Zfx			Klhl29
	Plxna2			Smarca5
	Zfp827			Hsbp1
	Yod1			Satb2
	Spen			Pdcd10
	Cep97			Tmtc2
	Tns1			Itga11
	Mrps14			Hspa12a
	Pum2			Meis2
	Ptpre			Eps8
	Ptgfrn			Ptprg
	Chd9			Mtpn
	Tom1l1			Cd99l2
	Appbp2			Zadh2
	Map4k3			Trim71
	Fam129b			Apex2
	Slc25a37			Mpz
	Fam171b			Elmsan1
	Magi3			Klhl13
	Camk2a			Pdcd6ip
	Pou2f1			Nxph1
	Pou3f1			Ssbp3
	Dgke			Fam210a
	Ankrd28			Cdc42
	Ubxn7			Rere
	Rps6ka5			Kdm2a
	Slc4a4			Tfap2a
	Arid1b			Bcl11b
	Mapk6			Il1rapl1
	Kbtbd12			B3galt2
	Fam131b			Nt5dc3
	Rtn1			Zbtb34
	Myo9a			Rc3h1
	D15Ertd621e			Map3k13
	Brd3			Tial1
	Tbc1d9			Cntnap2
	Plagl2			Rgs9bp
	9430038I01Rik			Elavl2
	Stt3b			Nub1
	Acer2			Csrnp3
	Osbpl6			Robo1
	Atp13a3			Cdk13
	Nhsl2			Zbtb21
	Jarid2			Glb1l
	Qk			Fzd9
	Zfp462			Rnf165
	Med12l			Npas3
	Nfatc3			Tbp
	Sel1l3			Slc25a24
	D16Ertd472e			Klf3
	Gm527			Has3
	Sox5			Syt9
	1190002N15Rik			Ptprj
	Guf1			Afap1
	Xkr8			Lats1
	Gas7			Inpp4a
	Ubr1			Wnt4
	Ccr1			Sash1
	Myt1l			Tango6
	Meis2			Ap1g1
	Mob1a			Enah
	Bmi1			Srpx
	Rhobtb1			Gga2
	St8sia2			Trpm6
	Fam219b			Trim44
	Mospd2			Cdc25b
	Gnpda2			Scml2
	Arid1a			Ttbk1
	Sass6			Dtx4
	Gemin5			Shc1
	Cntnap2			Rhobtb1
	Tfap2b			Pip4k2b
	Pou3f3			Tsku
	Slc36a1			BC089597
	4932411E22Rik			Jag1
	C77370			Otud6b
	Ccdc71l			Epb4.1l5
	Rnf128			Rbfox2
	Plxdc2			Taok1
	Ube2z			Xkr8
	Slc6a5			Thsd4
	Rock2			Mvb12b
	Cblb			Strbp
	Trpm6			Rps6kc1
	Zfp191			Brd4
	Adamts5			Phlpp2
	Prtg			Slc4a4
	Grin2b			Ago4
	Sh3rf3			Golga3
	Ahr			Zfp462
	Fign			Pura
	Magi2			Dlg2
	Phip			Clmn
	Celsr1			Dgcr8
	Lmbrd1			Vdr
	Itpripl2			Lhx9
	Nrp1			Rab10
	Pcmtd1			Zbtb1
	Ssbp2			Loxl4
	Rgma			Gabpb2
	Tmf1			Kctd16
	Cmip			A330021E22Rik
	Dstyk			Hecw2
	Tmem120b			Caln1
	Musk			Rbm15b
	Plxnd1			Socs7
	Gsk3b			Vwa5a
	Sort1			Sgms2
	Rnf150			Ikzf3
	Bzw1			Aip
	Dnal1			Zfp423
	Pdgfra			Map1b
	Maml1			Slc43a2
	Zfand1			Mrpl35
	Gata3			Bcl9l
	Slc25a27			Mms19
	Rnf169			Emcn
	Pten			Fancf
	Nr4a3			Mbd5
	Otud3			Mmaa
	Fmn1			Ell2
	Fam47e			Rbm4
	Rnf138			Lrrc4c
	FMN1			Slc15a5
	Hoxa10			Exoc6b
	Dhx40			Pld5
	Myo1c			Ret
	Abcc5			Mrpl15
	9430020K01Rik			Mapk1
	Ccdc171			Apc
	Zfp148			Zfp867
	Has3			Rsl24d1
	1810022K09Rik			Ccdc134
	Glce			Ctc1
	Bag4			Ikbke
	Jmjd1c			Bcl6
	Ppp2cb			Dtnbp1
	Trpm7			Gmpr
	Tcf4			Nkrf
	Tgfbr2			Aldh16a1
	Igsf10			Slc2a12
	Mars2			Tmem53
	Ywhae			Srl
	Rad9b			Ubap2
	Csnk2a1			Ncapd2
	Soga1			Fzd8
	Hs2st1			Mettl21c
	Btg1			Slc4a3
	Cit			Lphn3
	Mier3			Foxk2
	Ccne2			Plekhb1
	Syt2			Myl6
	Csnk1g1			Slc52a2
	Pbx3			3632451O06Rik
	Ulk1			Nkain3
	Sacs			Dnajb9
	Clcn3			Tuft1
	Ep300			Lenep
	Sp9			Rpp21
	Hipk2			Dcc
	Brpf3			Stag2
	Rc3h2			Ndufb9
	Fam189a1			Rsl1d1
	Slc22a23			Ccdc85b
	Pcdha10			Dhx15
	Arhgap5			Cetn3
	Pvrl3			Dgki
	Mapt			Nudt2
	Mgll			Prr16
	Nrip3			Spink3
	Ppl			Atxn10
	Hs3st3a1			Zap70
	Rims1			Tbc1d19
	Fam217b			Flad1
	Syt7
	Mmp24
	Cic
	Abcg4
	Ctnnb1
	Fam168a
	Ikzf2
	Clock
	Rps6ka4
	Flt1
	Bicc1
	Osr1
	Eya4
	Cers6
	Kcnb1
	Kcnh5
	Lsm6
	Col4a3
	Egr3
	March6
	Stox2
	Itga8
	Tppp
	Smad2
	Ptprd
	Efna5
	Flrt2
	Aff4
	Gdf11
	Strbp
	Rab11fip5
	Tmtc1
	Pappa
	Abhd2
	Abhd5
	Cir1
	Mtus1
	Dlgap1
	Dcaf5
	Adam12
	Pum1
	Mcl1
	Wnt2b
	Rassf2
	C2cd2
	Ube3c
	Ankrd17
	Ralbp1
	Trim36
	Zfp516
	Rab8b
	Rnf217
	Usp46
	Rbbp6
	Sertad4
	Gtf3c2
	Ppp2r2a
	Snx8
	Znhit6
	Brd1
	Gm17349
	Fam126a
	Taf3
	Chst3
	Lyl1
	Zbtb7a
	Prdm11
	Nup35
	Ccdc68
	Irf2bp2
	Lbr
	Erap1
	Lrp8
	Unkl
	Gda
	Lypla1
	Pbx1
	Phospho2
	Ythdf3
	Bbx
	Mroh7
	Zcchc2
	Med13
	Pdcd2
	Tnik
	Slc6a6
	Zfp282
	Iffo2
	Proser1
	Nr3c1
	Itga6
	Ppp3ca
	Atp2b4
	Ipo7
	Ptprb
	Ammecr1
	Rbms1
	Zbtb34
	Srf
	Ing3
	Qser1
	Hivep2
	Serbp1
	Hdac4
	Slc25a46
	Clcn5
	Fzd9
	Clasp1
	Slk
	Atf6
	Tnrc6c
	Mb21d2
	Arhgap35
	Ptbp2
	Nfia
	Nsd1
	Btaf1
	Wnt7a
	Gm6133
	Slit1
	Slc30a10
	Golim4
	Rybp
	Cxcl14
	Prss8
	Dlg2
	Arid2
	Arhgap42
	Smad4
	Hspa4l
	Rps6ka3
	Kctd6
	Bves
	Onecut1
	Shank1
	Tmem206
	Cep135
	Caln1
	Atg7
	Arpp19
	Hhip
	U2surp
	Pou3f4
	1110037F02Rik
	Adal
	Nucks1
	Nedd4l
	Cadm3
	Ephx1
	Meis1
	Cyp7b1
	Fam84a
	Pam16
	Il18
	Chid1
	F13a1
	Nploc4
	Stk3
	Lhx9
	Otp
	Tuba4a
	Vps13a
	Mbl1
	Loxl3
	Asb14
	Sorbs1
	Pmm2
	Slc43a1
	Ncoa4
	Ppt1
	Hn1
	Pik3cd
	Tmem120a
	Slc33a1
	Mmp16
	Gadd45gip1
	Snf8
	Plin4
	Exoc5
	Polr1e
	Arl4a
	3830406C13Rik
	Csf1r
	Gzf1
	Ppp1r1c
	Galntl6
	Rpn1
	Mterfd2
	Cops6
	Xrcc6
	Hpd
	Epha6
	Fgf12
	Aven
	2510002D24Rik
	Rars2
	Neurl1a
	Gss
	Tmem184b
	Il21
	Cinp
	Hfe2
	Cmtm6
	Rtn3
	Rab35
	Cyp4b1
	Htr2a

## Sheet: Additional Table 4
Additional Table 4
Predicted targets per miRNA that play a role in amyloid-beta production or TAU (de)phosphorylation. If the mouse homologue has a different name to the human version, the human name is mentioned in between brackets.
miR-10a	miR-142a	miR-146a	miR-155	miR-211	miR-455
Pten	Pik3ca (p110)		Rps6ka5 (MSK1)	Rps6ka5 (MSK1)	Mapt
	Aph1a		Gsk3b	Dyrk1a	Gsk3b
	Cdk5			Mapt	Aph1b
	Rps6ka5 (MSK1)			Ppp3r1	Dyrk1a
	Camk2a			Ppp1cc	Mapk10
	Pten				Prkaa1 (Ampk)
					Camk2a
					Aph1c
					Mapk8 (JNK)
					Ppp2ca
